# Supplementary material for: Urban Expansion and Carbon Emission Logistic Curve Hypothesis and Its Verification: A Case Study of Jiangsu Province
Source: MDPI journal article supplement (doi:10.3390/land11071066), 2022-07-13
Supplement: s1 [file s1]

# Supplementary Materials

**Table S1.** Built up area of Jiangsu Province, Southern Jiangsu, Central Jiangsu, Northern Jiangsu and 13 prefecture level cities (km<sup>2</sup>)

| Region           | 2002    | 2003    | 2004    | 2005    | 2006    | 2007    | 2008    | 2009    | 2010    |
|------------------|---------|---------|---------|---------|---------|---------|---------|---------|---------|
| Jiangsu          | 1939.22 | 2119.52 | 2252.85 | 2378.6  | 2583    | 2713.92 | 2904.32 | 3046.37 | 3271.09 |
| Nanjing          | 438.63  | 446.79  | 484.27  | 512.60  | 574.94  | 577.44  | 592.07  | 598.14  | 618.64  |
| Suzhou           | 295.39  | 329.83  | 420.84  | 432.82  | 497.23  | 523.89  | 623.39  | 641.76  | 680.4   |
| Wuxi             | 255.76  | 264.45  | 278.98  | 288.88  | 294.3   | 314.16  | 319.67  | 330.9   | 348.5   |
| Changzhou        | 112.26  | 114.97  | 124.86  | 134.83  | 142.78  | 149.5   | 162.53  | 176.93  | 197.45  |
| Zhenjiang        | 116.32  | 141.35  | 129.63  | 132.2   | 142.24  | 136.29  | 141.45  | 154.56  | 162.96  |
| Southern Jiangsu | 1218.36 | 1297.39 | 1438.58 | 1501.33 | 1651.49 | 1701.28 | 1839.11 | 1902.29 | 2007.95 |
| Yangzhou         | 111.95  | 121.09  | 139.08  | 154.15  | 149.8   | 156.26  | 161.95  | 167.5   | 173.4   |
| Taizhou          | 103.56  | 115.93  | 125.54  | 137.38  | 137.48  | 145.02  | 151.13  | 155.18  | 162.58  |
| Nantong          | 124.34  | 146.43  | 109.42  | 107.73  | 111.53  | 114.03  | 122.9   | 143.68  | 178.35  |
| Central Jiangsu  | 339.85  | 383.45  | 374.04  | 399.26  | 398.81  | 415.31  | 435.98  | 466.36  | 514.33  |
| Xuzhou           | 149.86  | 134.25  | 146.56  | 172.6   | 200.63  | 242.9   | 253.9   | 276.07  | 311.05  |
| Lianyungang      | 61.1    | 62.59   | 69.65   | 77.69   | 85.5    | 90      | 95      | 100     | 120     |
| Suqian           | 30      | 30      | 32.03   | 33.8    | 47.6    | 50.2    | 58.4    | 63.42   | 65      |
| Huai'an          | 64      | 115.16  | 80      | 85      | 89      | 95      | 100     | 110     | 120     |
| Yancheng         | 76.05   | 96.68   | 111.99  | 108.92  | 109.97  | 119.23  | 121.93  | 128.23  | 132.76  |
| Northern Jiangsu | 381.01  | 438.68  | 440.23  | 478.01  | 532.7   | 597.33  | 629.23  | 677.72  | 748.81  |
| Region           | 2011    | 2012    | 2013    | 2014    | 2015    | 2016    | 2017    | 2018    | 2019    |
| Jiangsu          | 3493.78 | 3655.05 | 3809.6  | 4019.83 | 4189.17 | 4299.26 | 4426.51 | 4558.41 | 4648.33 |
| Nanjing          | 637.71  | 653.31  | 713.29  | 734.34  | 755.27  | 773.79  | 796.35  | 817.39  | 822.97  |
| Suzhou           | 698.9   | 719.94  | 727.16  | 735.15  | 747.84  | 733.39  | 751.23  | 756.2   | 760.05  |
| Wuxi             | 409.9   | 441     | 455.51  | 522.42  | 532.43  | 537.88  | 546.16  | 552.09  | 557.19  |
| Changzhou        | 218.26  | 229.69  | 234.23  | 253.86  | 278.79  | 290.17  | 295.59  | 300     | 305.95  |
| Zhenjiang        | 172.65  | 180.35  | 190.44  | 204.79  | 210.4   | 214.4   | 218.62  | 222.04  | 227.11  |
| Southern Jiangsu | 2137.42 | 2224.29 | 2320.63 | 2450.56 | 2524.73 | 2549.63 | 2607.95 | 2647.72 | 2673.27 |
| Yangzhou         | 186.31  | 191.35  | 196.4   | 200.6   | 205.75  | 215.23  | 230.21  | 238.11  | 245.62  |
| Taizhou          | 170.23  | 185.47  | 190.27  | 195.97  | 203.12  | 215.52  | 224.92  | 236.78  | 253.08  |
| Nantong          | 200.59  | 224.86  | 249.5   | 274.16  | 295.65  | 312.46  | 326.25  | 369.53  | 380.38  |
| Central Jiangsu  | 557.13  | 601.68  | 636.17  | 670.73  | 704.52  | 743.21  | 781.38  | 844.42  | 879.08  |

|                     |        |        |        |        |        |         |         |         |         |
|---------------------|--------|--------|--------|--------|--------|---------|---------|---------|---------|
| Xuzhou              | 323.05 | 328.18 | 330.52 | 335.74 | 336.05 | 343.57  | 349.14  | 357.71  | 370.32  |
| Lianyungang         | 130    | 140    | 150    | 160    | 206    | 214     | 223     | 223     | 223     |
| Suqian              | 68.08  | 70     | 74.78  | 78.53  | 84.7   | 86.04   | 89.8    | 94.26   | 100.16  |
| Huai'an             | 130    | 136    | 140    | 150    | 155    | 178.5   | 185     | 190     | 198     |
| Yancheng            | 148.1  | 154.9  | 157.5  | 174.27 | 178.17 | 184.31  | 190.24  | 201.3   | 204.5   |
| Northern<br>Jiangsu | 799.23 | 829.08 | 852.8  | 898.54 | 959.92 | 1006.42 | 1037.18 | 1066.27 | 1095.98 |

Notes: The above data are from the China Urban Construction Statistical Yearbook (2002-2019).

**Table S2.** Cumulative carbon emissions of Jiangsu, Southern Jiangsu, Central Jiangsu, Northern Jiangsu and 13 prefecture level cities (10<sup>4</sup>t)

| Region              | 2002      | 2003      | 2004      | 2005      | 2006      | 2007      | 2008      | 2009      | 2010      |
|---------------------|-----------|-----------|-----------|-----------|-----------|-----------|-----------|-----------|-----------|
| Jiangsu             | 70652.56  | 87863.81  | 103033.87 | 119520.45 | 151469.05 | 175700.29 | 216822.07 | 252409.75 | 317798.59 |
| Nanjing             | 7446.57   | 16001.01  | 25519.23  | 37251.22  | 49111.47  | 61765.34  | 73893.41  | 86812.03  | 101185.02 |
| Suzhou              | 2464.36   | 5521.97   | 9660.16   | 15725.02  | 23157.19  | 31850.49  | 40798.10  | 50476.00  | 60898.68  |
| Wuxi                | 2148.57   | 4798.17   | 8203.95   | 11996.33  | 16215.53  | 20678.39  | 25119.54  | 29815.03  | 34920.21  |
| Changzhou           | 944.93    | 2126.47   | 3678.37   | 5303.74   | 7248.96   | 9651.48   | 11986.28  | 14365.36  | 17060.04  |
| Zhenjiang           | 1408.55   | 3004.74   | 4793.43   | 6749.62   | 8813.94   | 10823.02  | 12802.48  | 14936.12  | 17187.57  |
| Southern<br>Jiangsu | 14412.98  | 31452.35  | 51855.14  | 77025.94  | 104547.09 | 134768.72 | 164599.81 | 196404.54 | 231251.51 |
| Yangzhou            | 1000.01   | 2130.95   | 3421.92   | 4898.01   | 6493.05   | 8566.20   | 10652.47  | 13109.25  | 15630.28  |
| Taizhou             | 882.51    | 2015.43   | 3269.77   | 4645.52   | 6584.34   | 8779.36   | 11294.06  | 14003.12  | 16887.95  |
| Nantong             | 1057.33   | 2345.54   | 3806.12   | 5439.07   | 7189.68   | 9043.39   | 10936.99  | 12800.64  | 15517.79  |
| Central<br>Jiangsu  | 2939.85   | 6491.91   | 10701.91  | 15186.71  | 20471.18  | 26593.06  | 33087.63  | 40117.11  | 48240.12  |
| Xuzhou              | 2420.73   | 5388.23   | 9006.09   | 13167.12  | 17502.83  | 22371.98  | 27681.32  | 33297.53  | 39654.49  |
| Lianyungang         | 375.78    | 796.60    | 1280.71   | 1905.71   | 2605.02   | 3287.80   | 4039.86   | 5136.39   | 5695.07   |
| Suqian              | 119.65    | 259.33    | 437.95    | 655.51    | 867.79    | 1059.59   | 1247.43   | 1443.12   | 1677.69   |
| Huai'an             | 1160.03   | 2430.61   | 3811.74   | 5303.41   | 6913.95   | 8522.48   | 10247.51  | 12033.12  | 13935.69  |
| Yancheng            | 705.40    | 1467.34   | 2285.82   | 3160.84   | 4092.40   | 5107.37   | 6095.46   | 7104.90   | 8122.20   |
| Northern<br>Jiangsu | 4781.58   | 5521.97   | 9660.16   | 15725.02  | 23157.19  | 31850.49  | 40798.10  | 50476.00  | 60898.68  |
| Region              | 2011      | 2012      | 2013      | 2014      | 2015      | 2016      | 2017      | 2018      | 2019      |
| Jiangsu             | 393697.46 | 455171.48 | 518558.06 | 610209.30 | 686819.74 | 737071.27 | 794833.64 | 853578.72 | 892574.80 |
| Nanjing             | 117027.57 | 132698.28 | 149870.88 | 167304.43 | 186036.40 | 205420.61 | 224337.71 | 244260.37 | 264371.07 |
| Suzhou              | 72227.53  | 83818.65  | 95776.39  | 107629.40 | 119477.41 | 131842.27 | 144063.29 | 156719.47 | 170197.68 |
| Wuxi                | 40359.53  | 45878.92  | 52088.91  | 58006.07  | 63670.10  | 69931.39  | 76489.25  | 83071.52  | 89751.78  |
| Changzhou           | 20160.15  | 23107.28  | 26543.06  | 29941.32  | 33286.44  | 36836.36  | 40750.36  | 44582.42  | 48638.56  |
| Zhenjiang           | 19839.89  | 22691.36  | 25690.79  | 29111.16  | 32229.70  | 35613.83  | 38860.25  | 41656.86  | 44887.30  |
| Southern<br>Jiangsu | 269614.67 | 308194.50 | 349970.02 | 391992.38 | 434700.04 | 479644.45 | 524500.87 | 570290.65 | 617846.39 |
| Yangzhou            | 18174.08  | 20589.39  | 23170.02  | 25681.67  | 28023.20  | 30629.52  | 33327.76  | 36033.86  | 38756.03  |
| Taizhou             | 19891.53  | 22721.47  | 25659.68  | 28590.74  | 32053.06  | 36580.56  | 41175.94  | 45743.78  | 49909.40  |

|                     |          |          |          |           |           |           |           |           |           |
|---------------------|----------|----------|----------|-----------|-----------|-----------|-----------|-----------|-----------|
| Nantong             | 18444.58 | 21340.87 | 24276.02 | 27562.64  | 30785.92  | 34049.96  | 37286.33  | 40344.13  | 43336.64  |
| Central<br>Jiangsu  | 56714.29 | 64855.83 | 73309.83 | 82039.15  | 91066.29  | 101464.14 | 111994.14 | 122325.86 | 132206.17 |
| Xuzhou              | 46864.94 | 54461.46 | 62333.05 | 69633.01  | 76361.32  | 83044.13  | 89180.77  | 94804.94  | 100487.07 |
| Lianyungang         | 7648.30  | 9858.41  | 12310.72 | 15052.36  | 17952.43  | 21181.50  | 24446.09  | 27746.26  | 31369.91  |
| Suqian              | 1908.54  | 2121.59  | 2474.04  | 2793.66   | 3128.71   | 3371.72   | 3609.66   | 3885.18   | 4493.93   |
| Huai'an             | 16034.36 | 18139.70 | 20251.71 | 22334.32  | 24475.18  | 26654.14  | 31709.13  | 33264.13  | 35534.87  |
| Yancheng            | 9052.68  | 10013.94 | 11651.55 | 13422.84  | 15176.36  | 16857.71  | 18455.20  | 20750.91  | 22999.21  |
| Northern<br>Jiangsu | 72227.53 | 83818.65 | 95776.39 | 107629.40 | 119477.41 | 131842.27 | 144063.29 | 156719.47 | 170197.68 |

Notes: The above data are based on the energy consumption data of industrial enterprises above the scale in the statistical yearbooks of 13 prefecture-level cities in Jiangsu Province, calculated according to formula (1). Taizhou City, Nantong City, Xuzhou City, Suqian City, Huai'an City, Yancheng City, missing data for individual years by taking the average of the upper and lower two years.

**Table S3.** Coefficients of quadratic derivative equation of Logistic equation in Jiangsu, Southern Jiangsu, Central Jiangsu, Northern Jiangsu and 13 prefecture level cities.

| Region              | A                | B            | C      |
|---------------------|------------------|--------------|--------|
| Jiangsu             | 537.1703         | 229.7518     | -0.128 |
| Nanjing             | 165.2918         | 27.882       | -0.614 |
| Suzhou              | 70550054405.1069 | 3520100.1882 | -1.053 |
| Wuxi                | 1146.7541        | 105.3195     | -0.952 |
| Changzhou           | 1783.3638        | 92.1115      | -1.674 |
| Zhenjiang           | 15967.4683       | 305.5154     | -2.677 |
| Southern<br>Jiangsu | 2950.9759        | 405.8566     | -0.192 |
| Yangzhou            | 229578.4425      | 3108.8244    | -4.257 |
| Taizhou             | 47450.0082       | 733.6265     | -3.415 |
| Nantong             | 322.9943         | 33.3814      | -1.411 |
| Central Jiangsu     | 1401.0259        | 151.1081     | -0.8   |
| Xuzhou              | 272387895.8975   | 41564.5292   | -1.263 |
| Lianyungang         | 1607.4806        | 79.4398      | -2.279 |
| Suqian              | 1276.1492        | 76.0203      | -5.013 |
| Huai'an             | 4189.8412        | 101.5955     | -3.195 |
| Yancheng            | 4448.8882        | 166.1681     | -2.694 |
| Northern<br>Jiangsu | 980.3357         | 132.8198     | -0.502 |
